# Supplementary material
Source: PubMed Central journal article supplement (PMC2701644)

# **Stereoselective Synthesis of the C(1)-C(19) Fragment of Tetrafibricin**

Ricardo Lira and William R. Roush\*

Departments of Chemistry and Biochemistry

Scripps Florida, Jupiter, FL 33458

e-mail: [roush@scripps.edu](mailto:roush@scripps.edu)

**Supporting Information:**

**Selected  $^1\text{H}$  NMR and  $^{13}\text{C}$  NMR Spectra for Key Compounds**

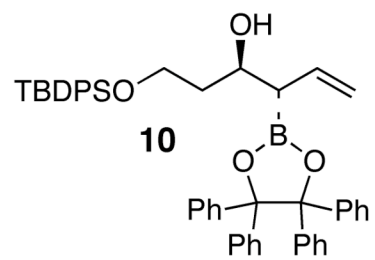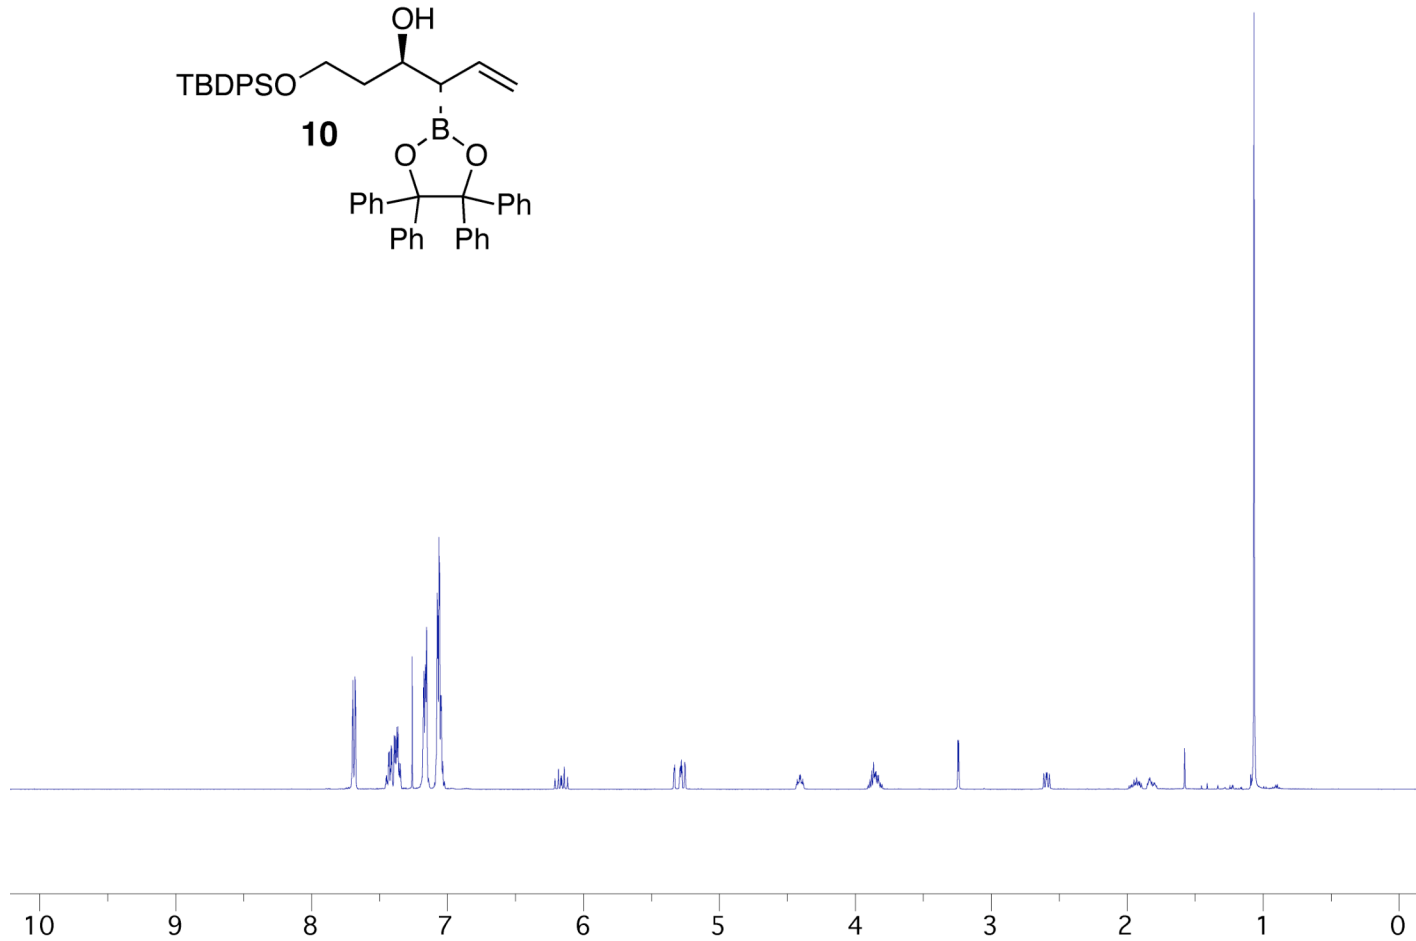





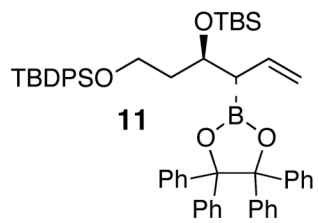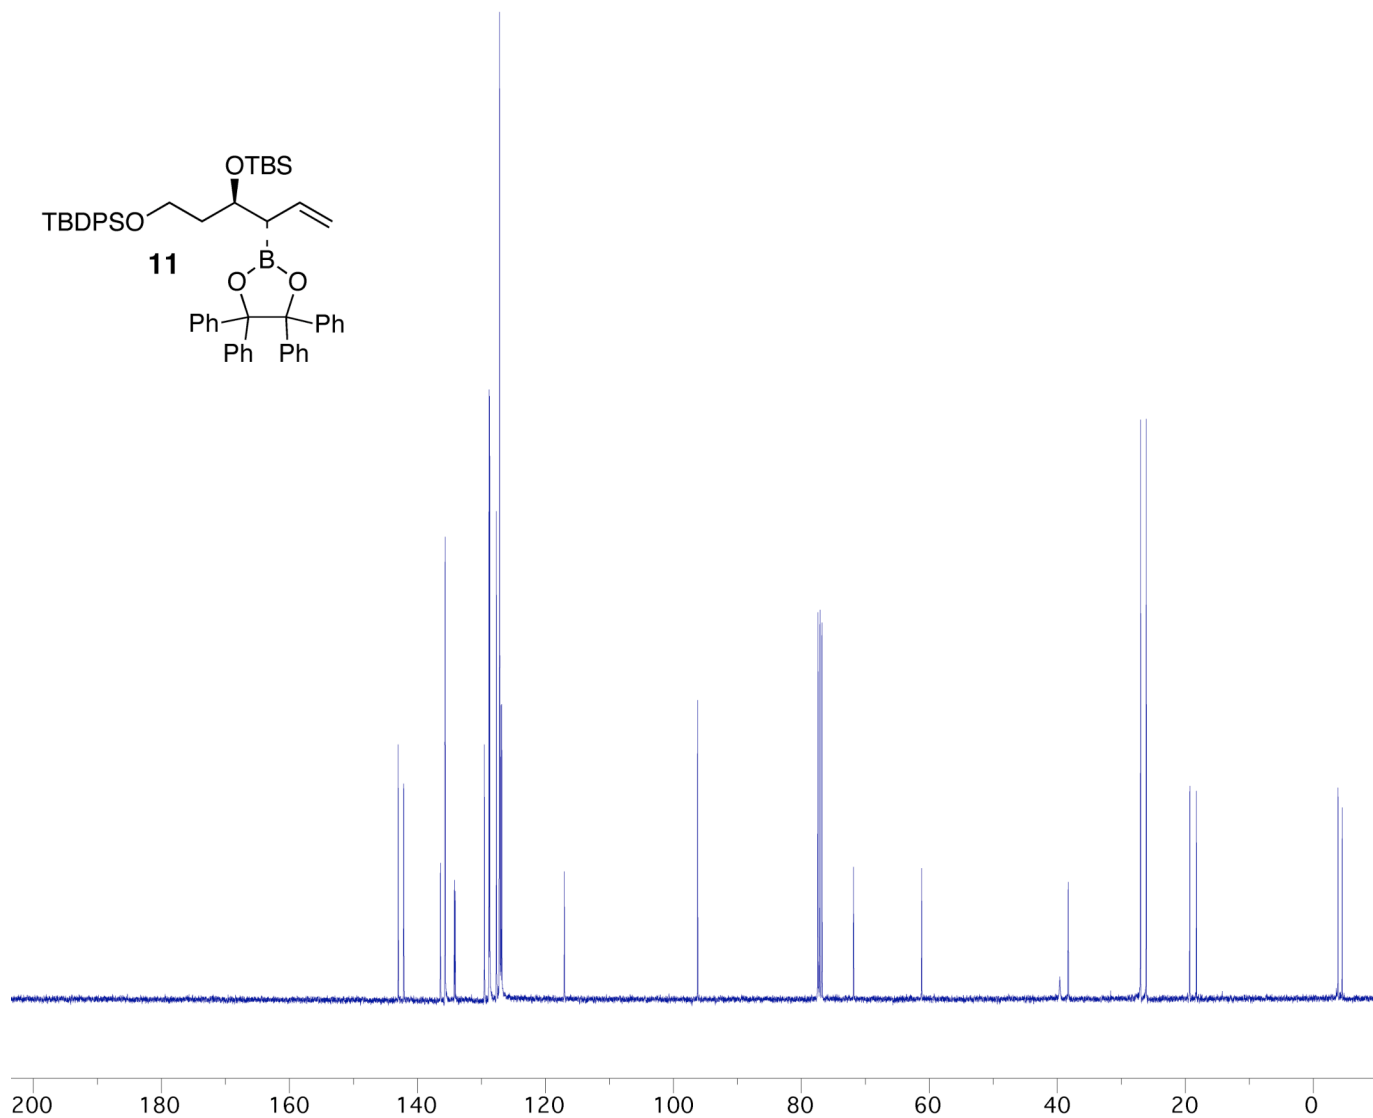





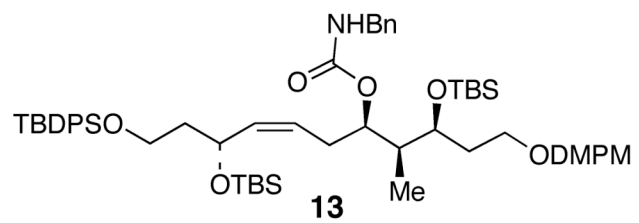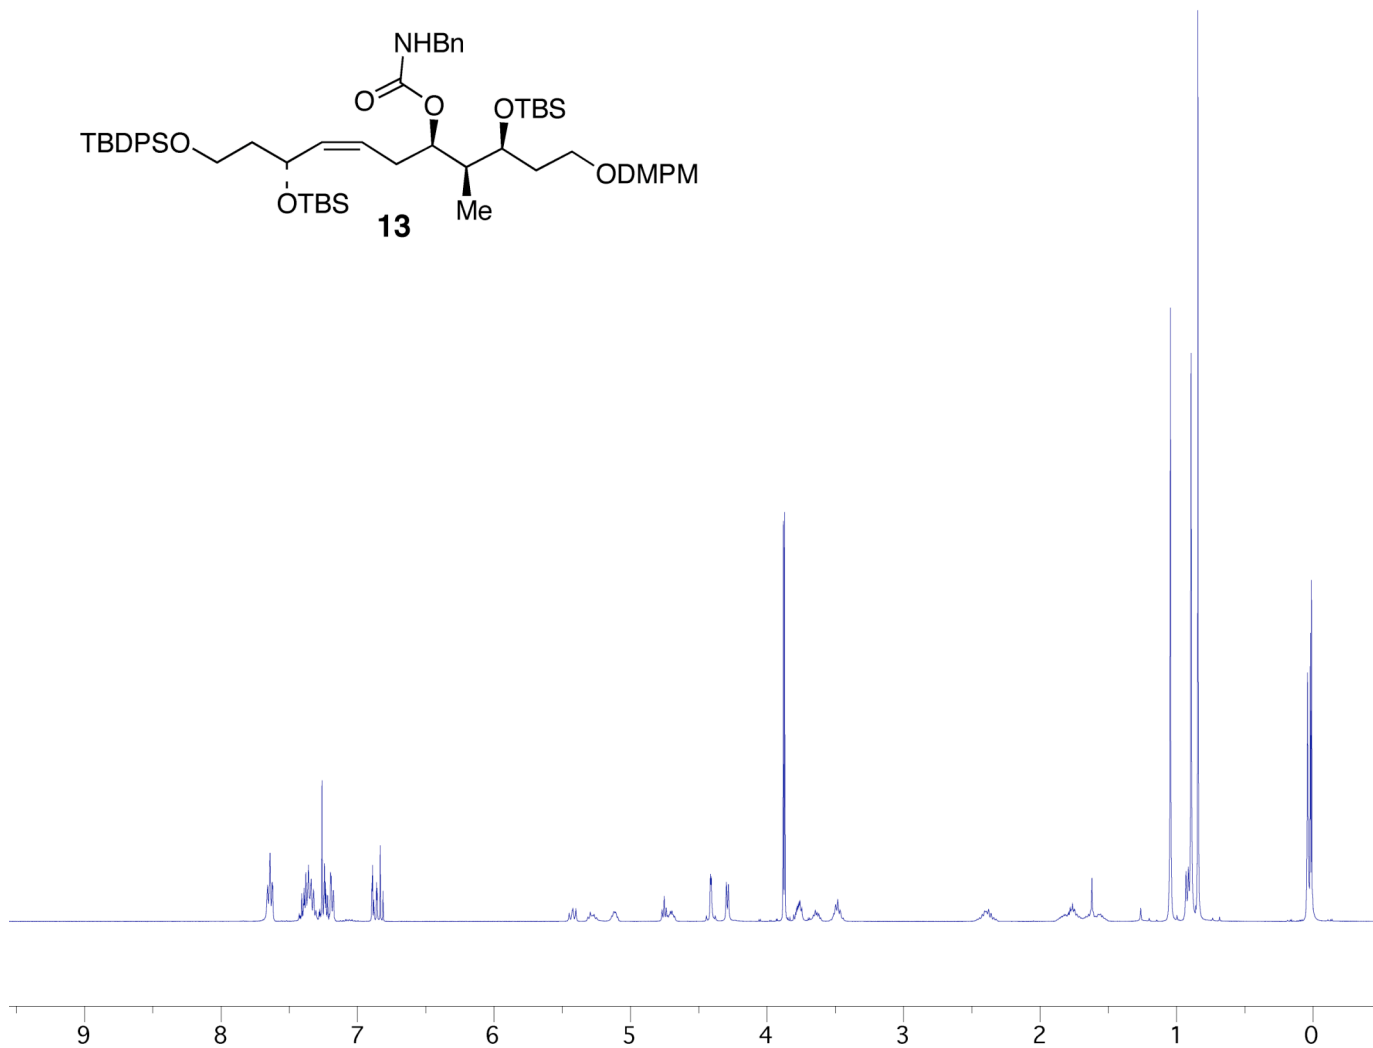



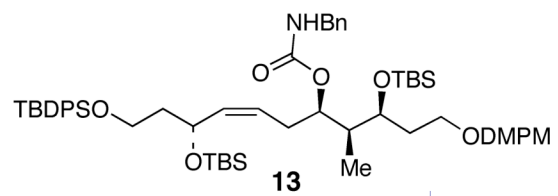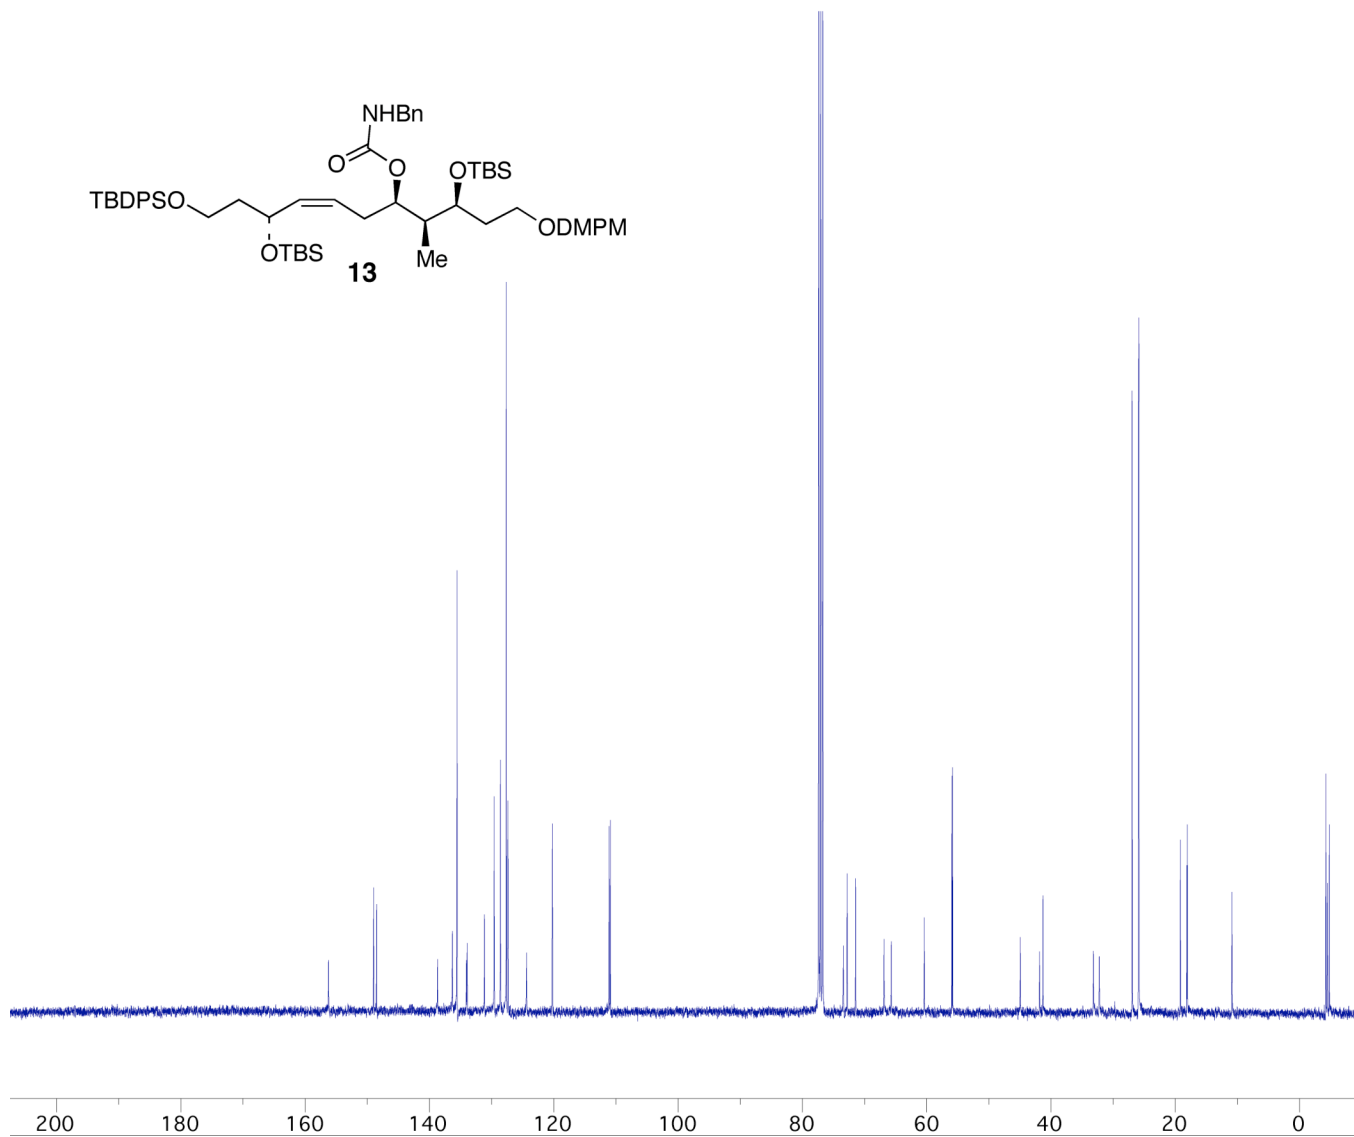

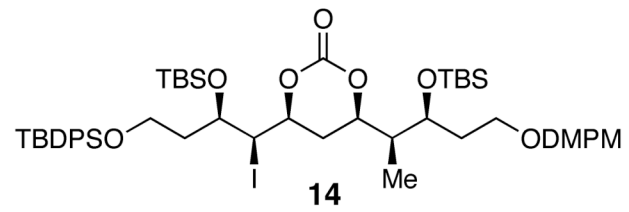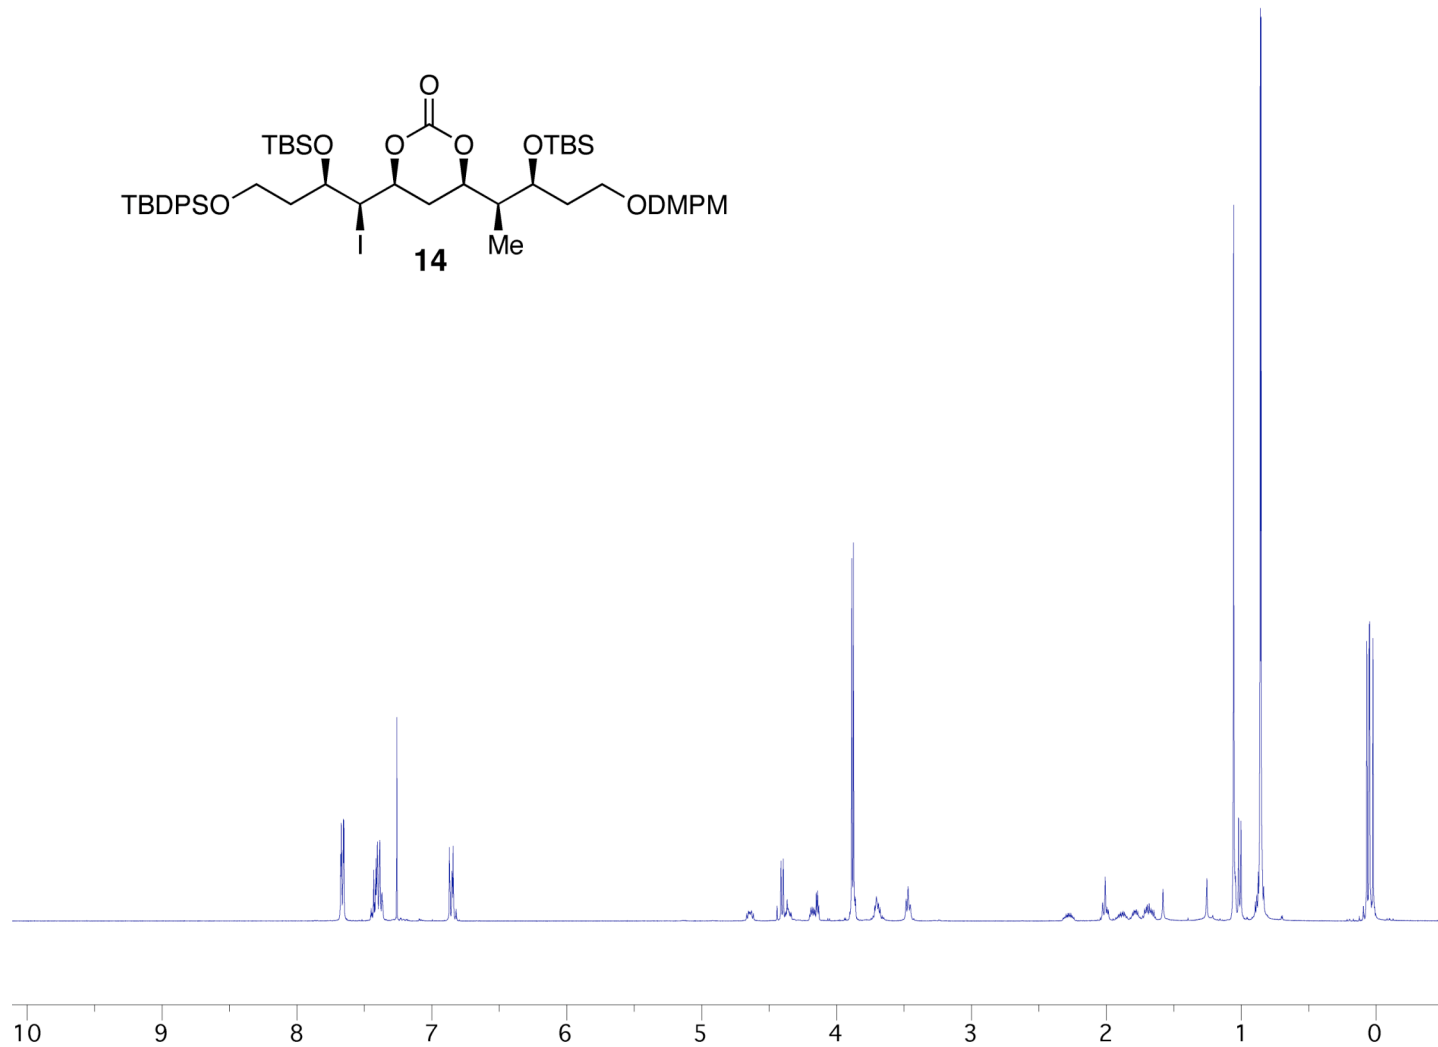

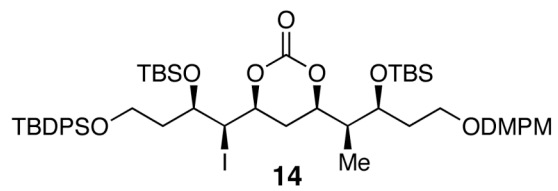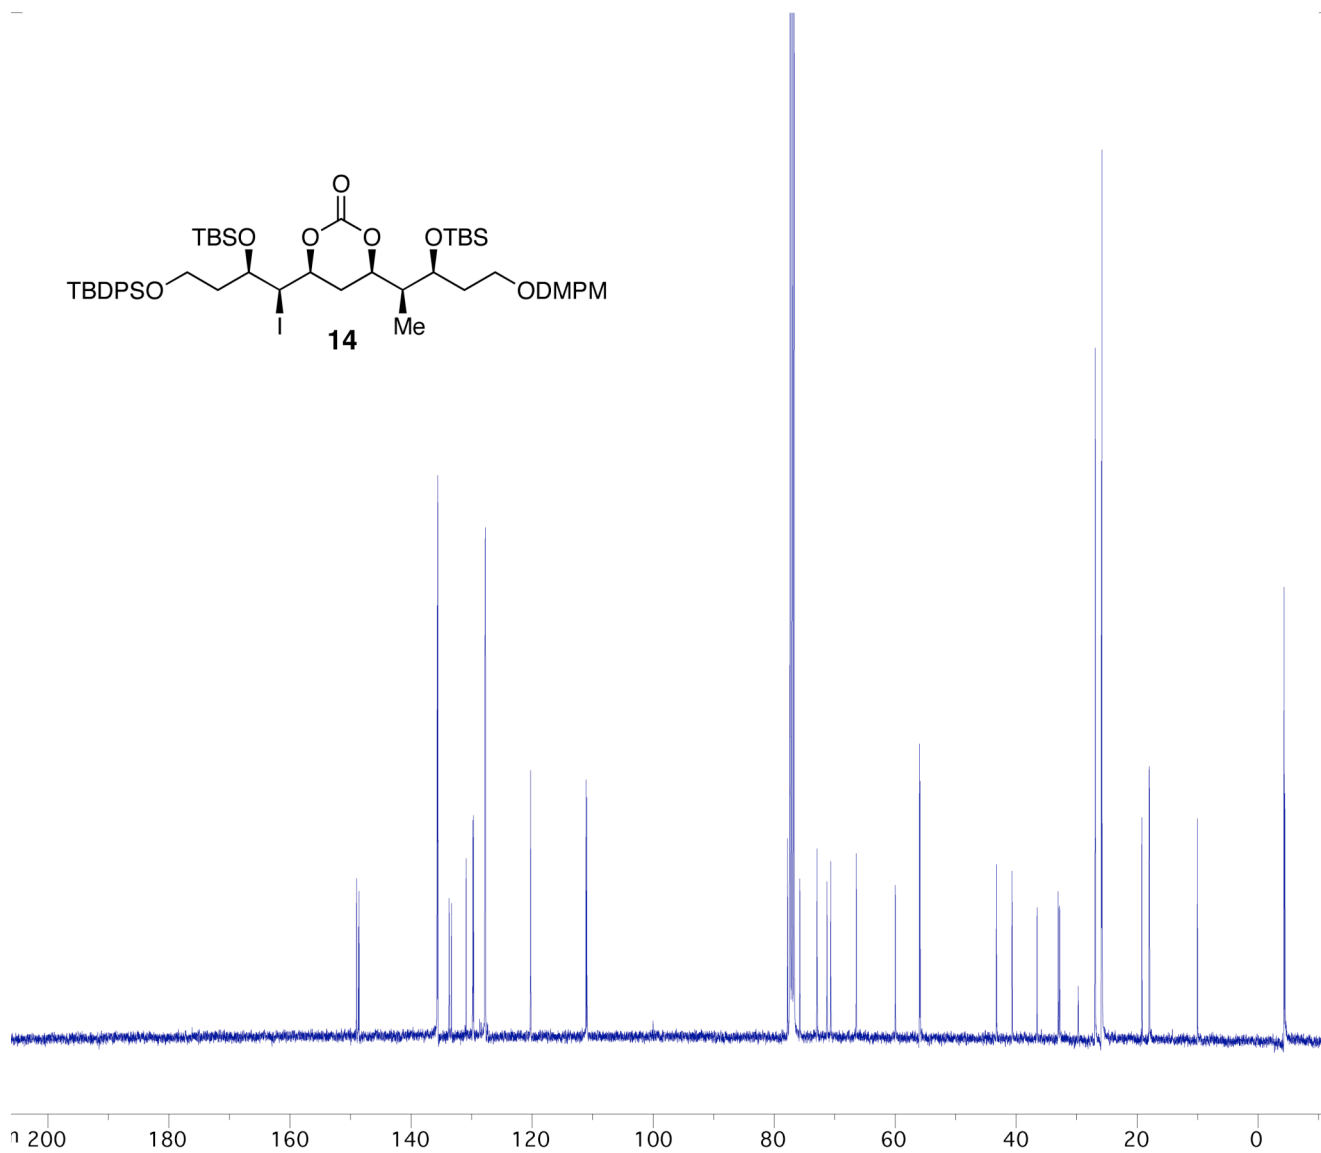

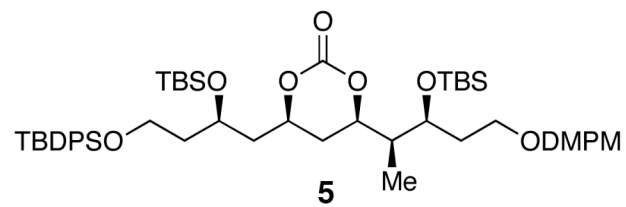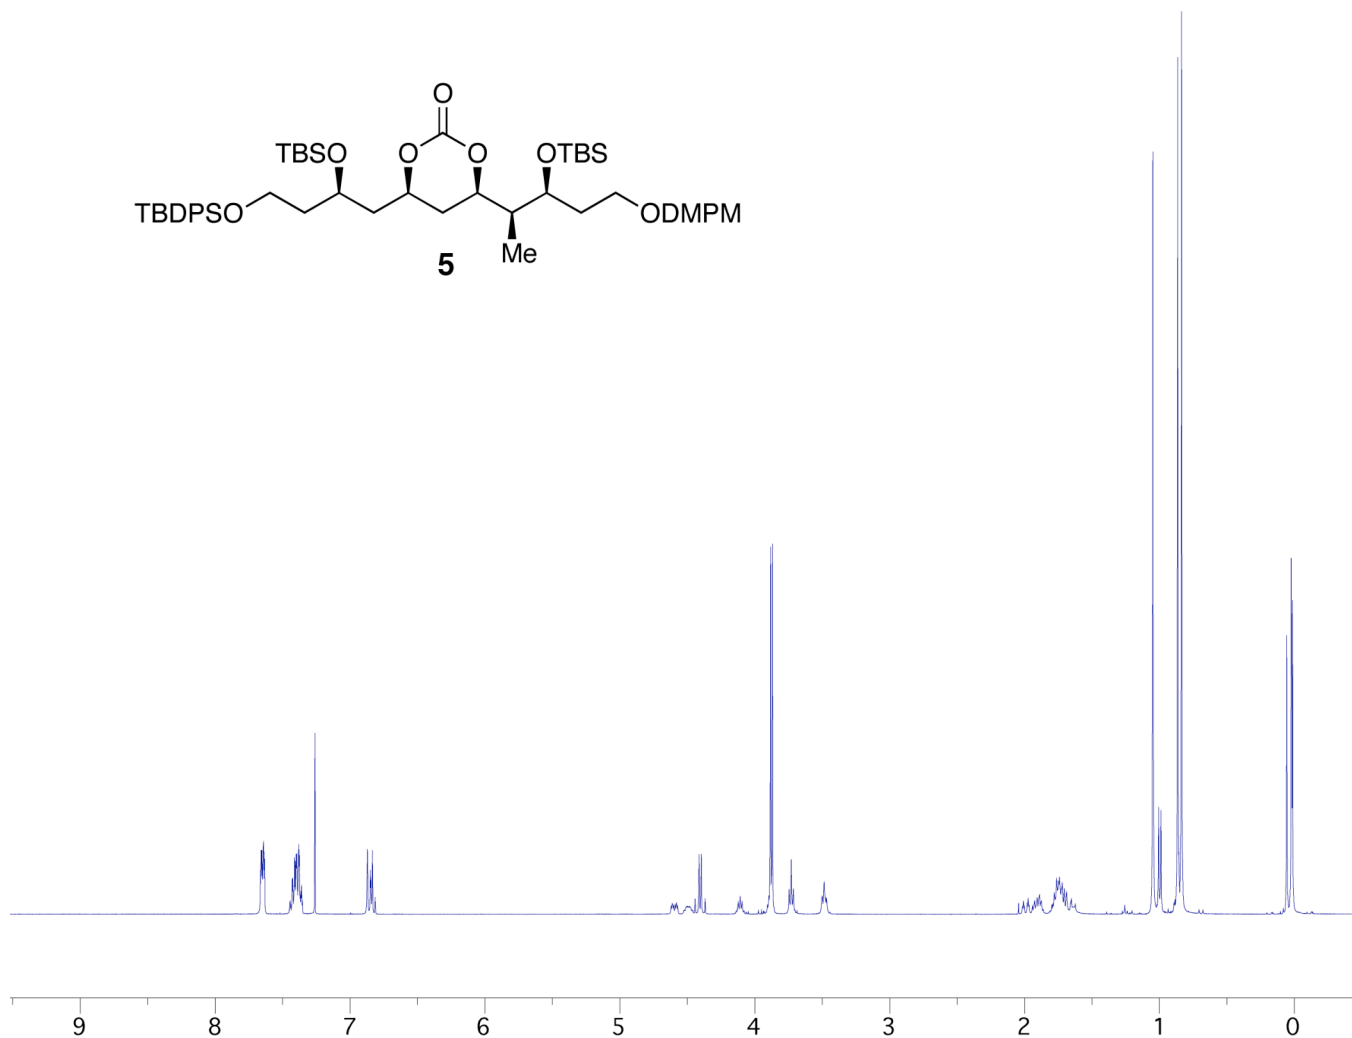



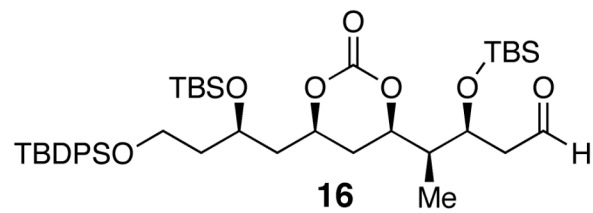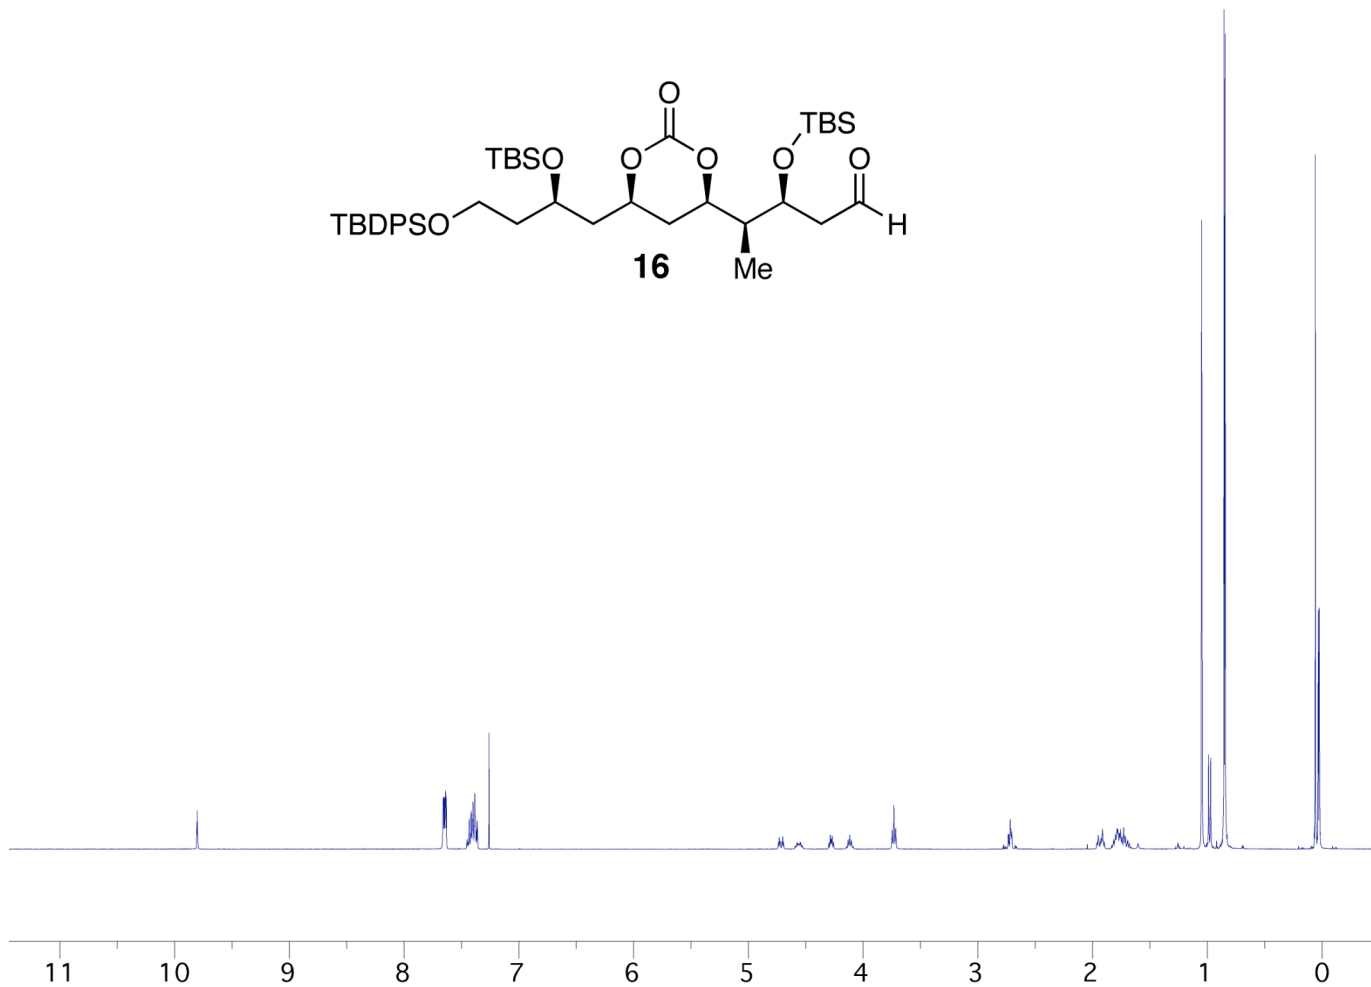

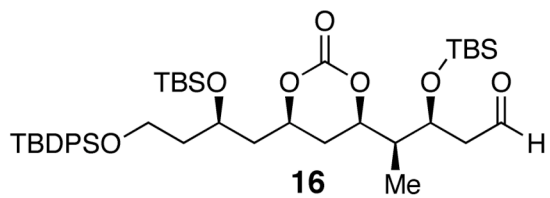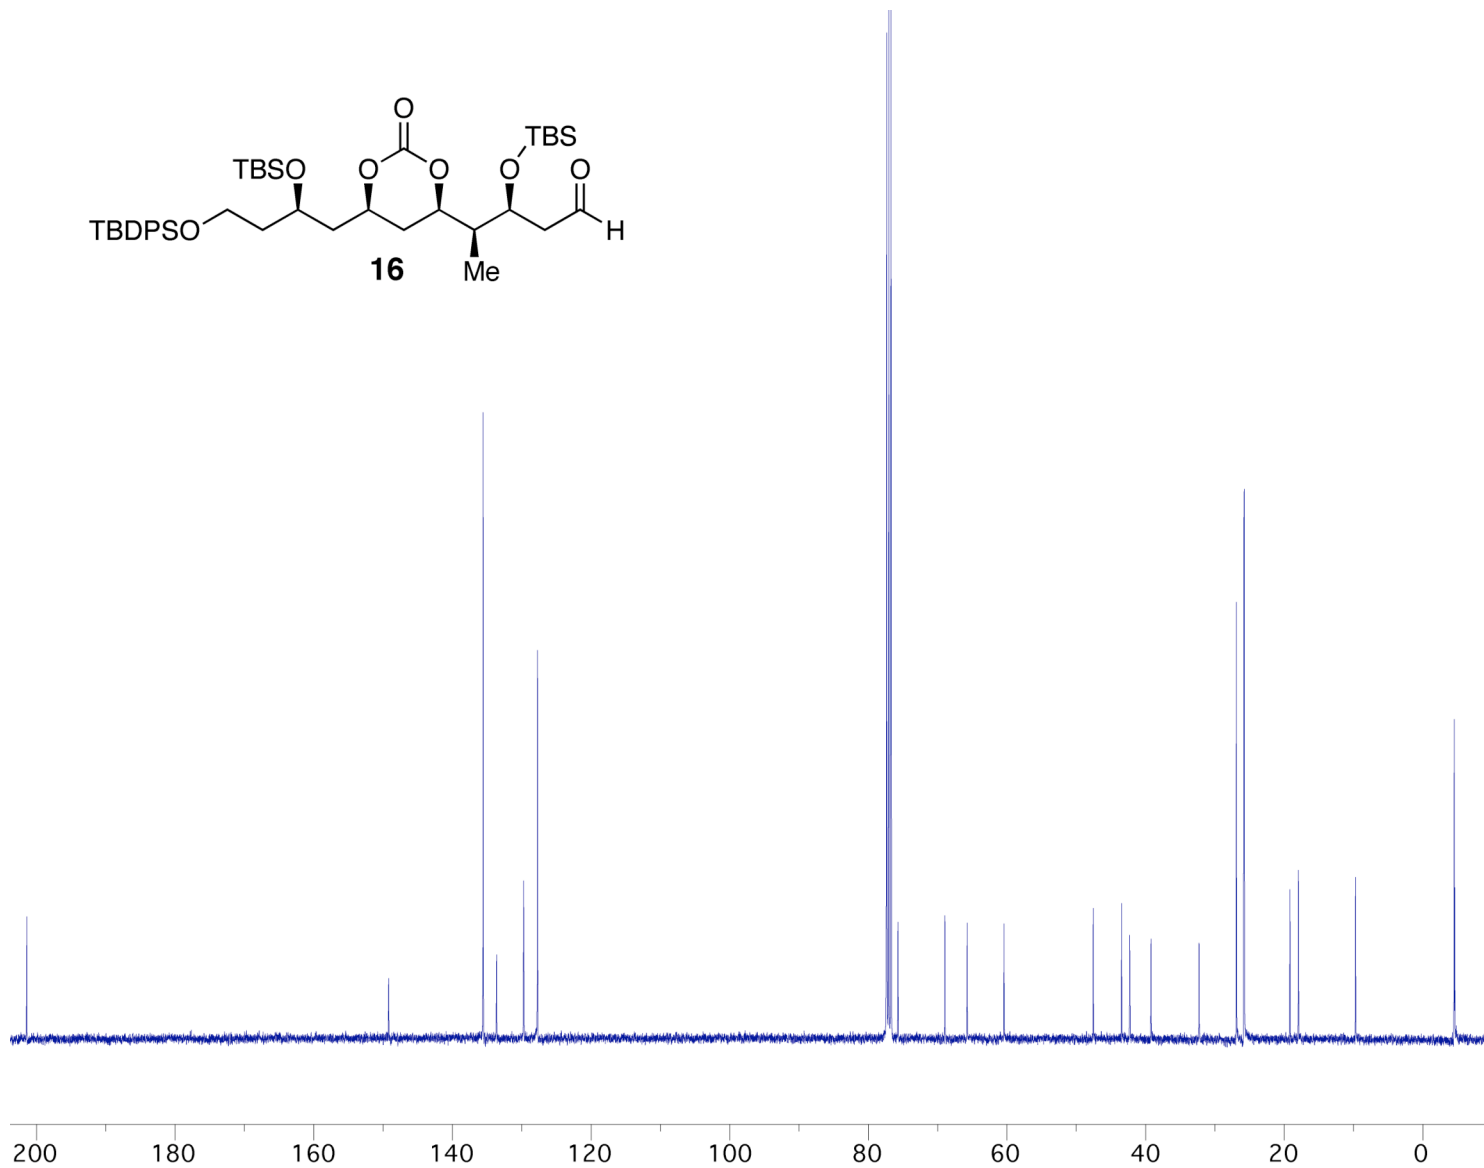

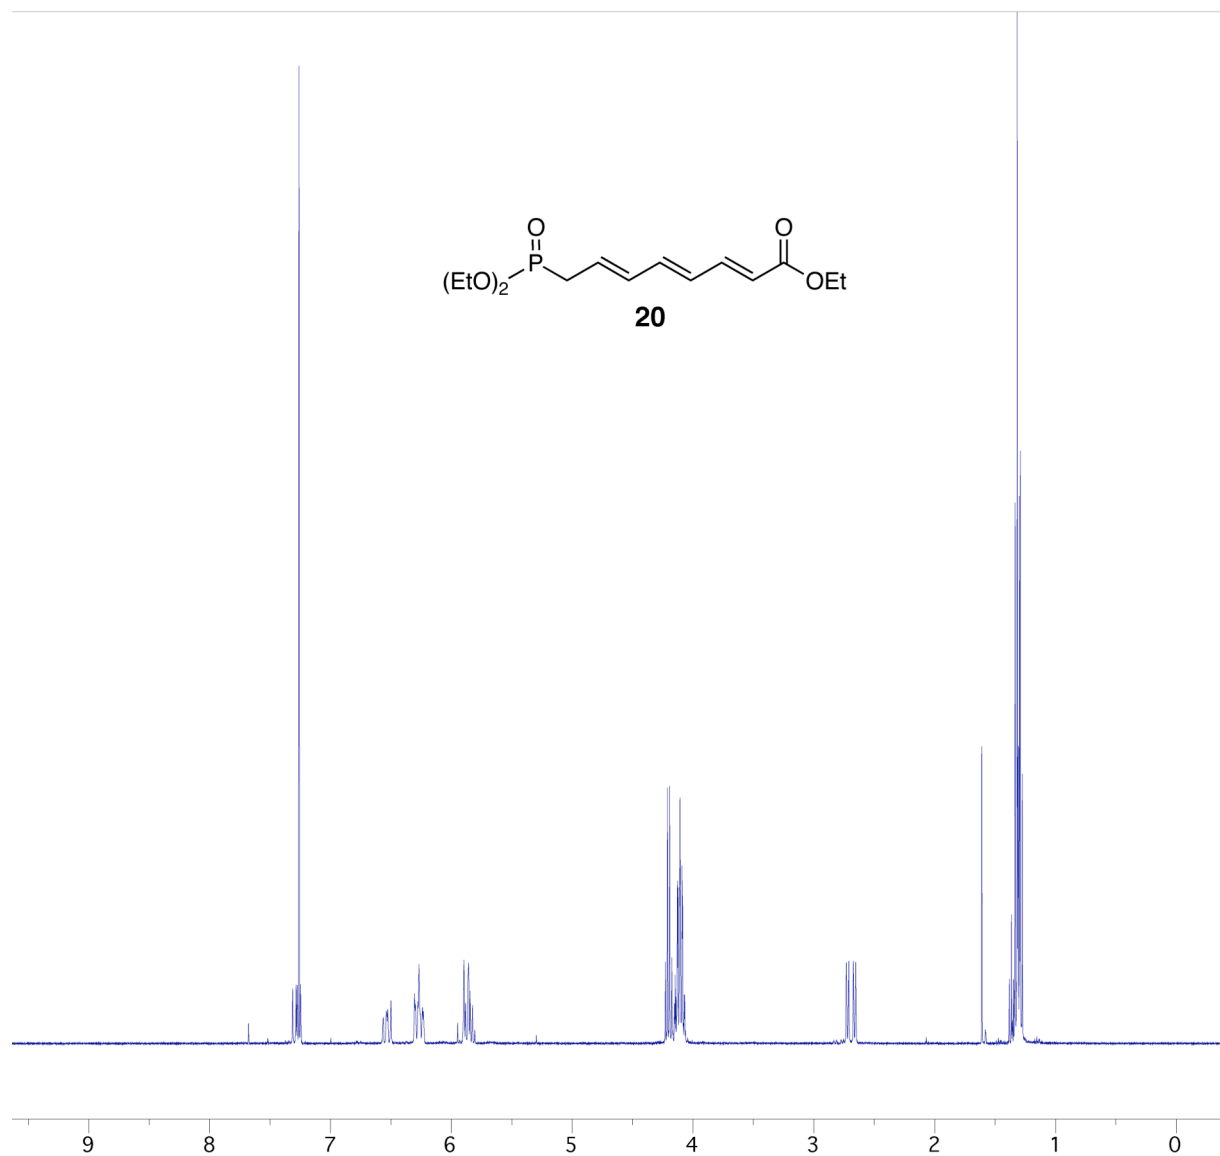



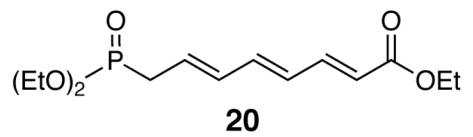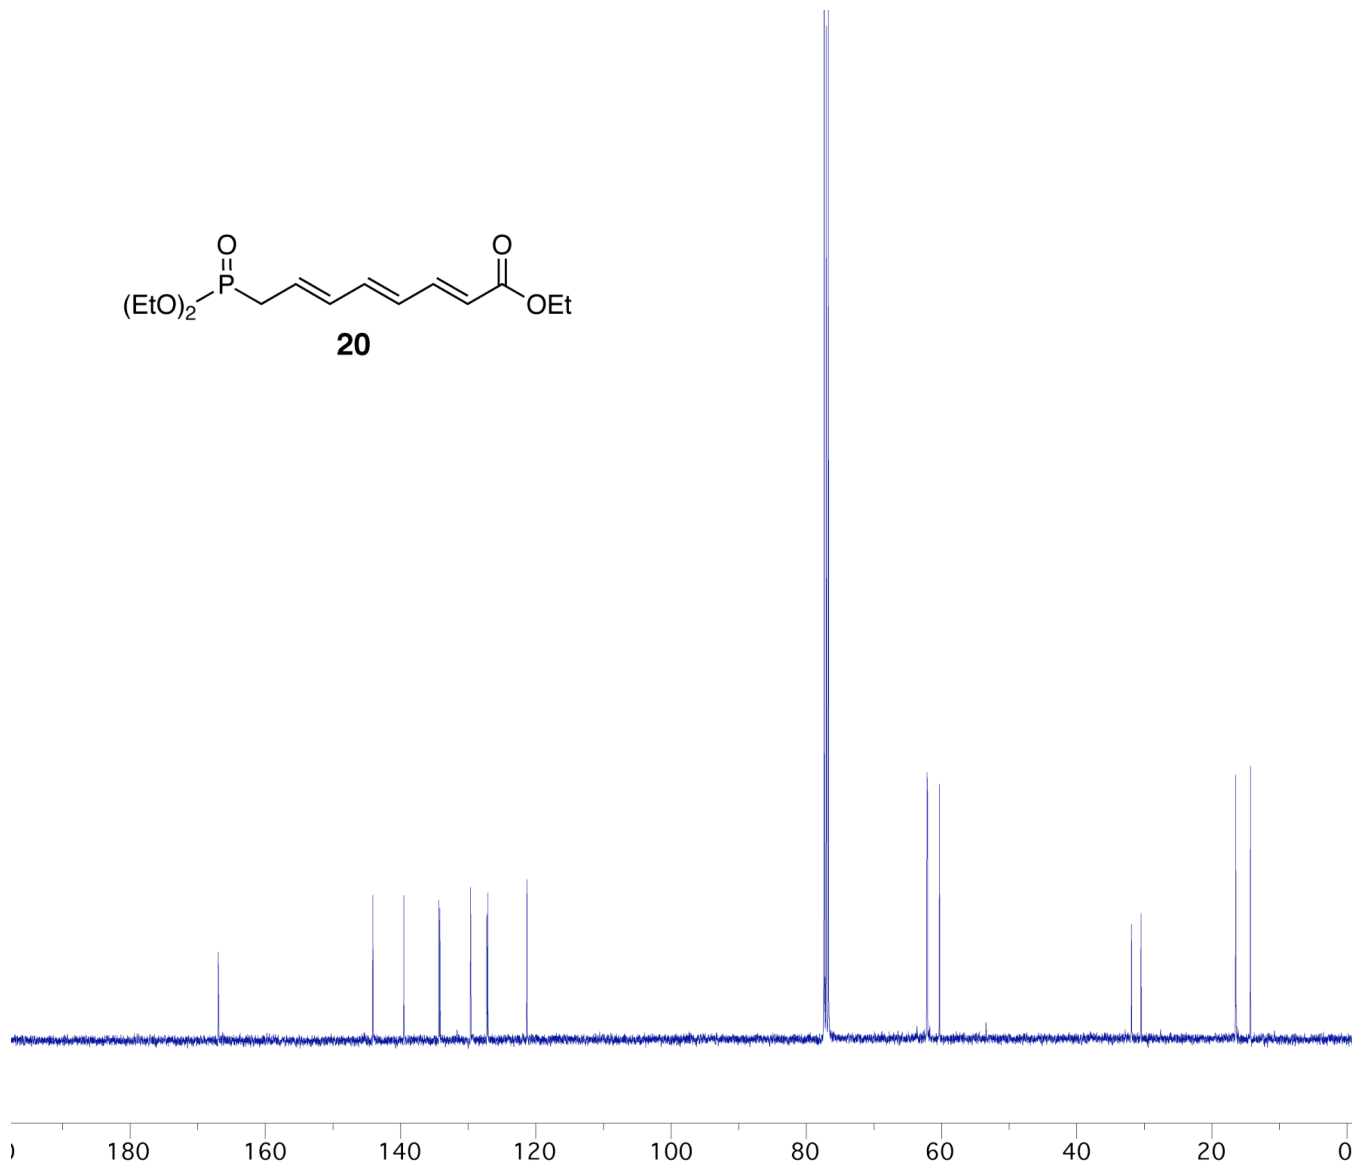

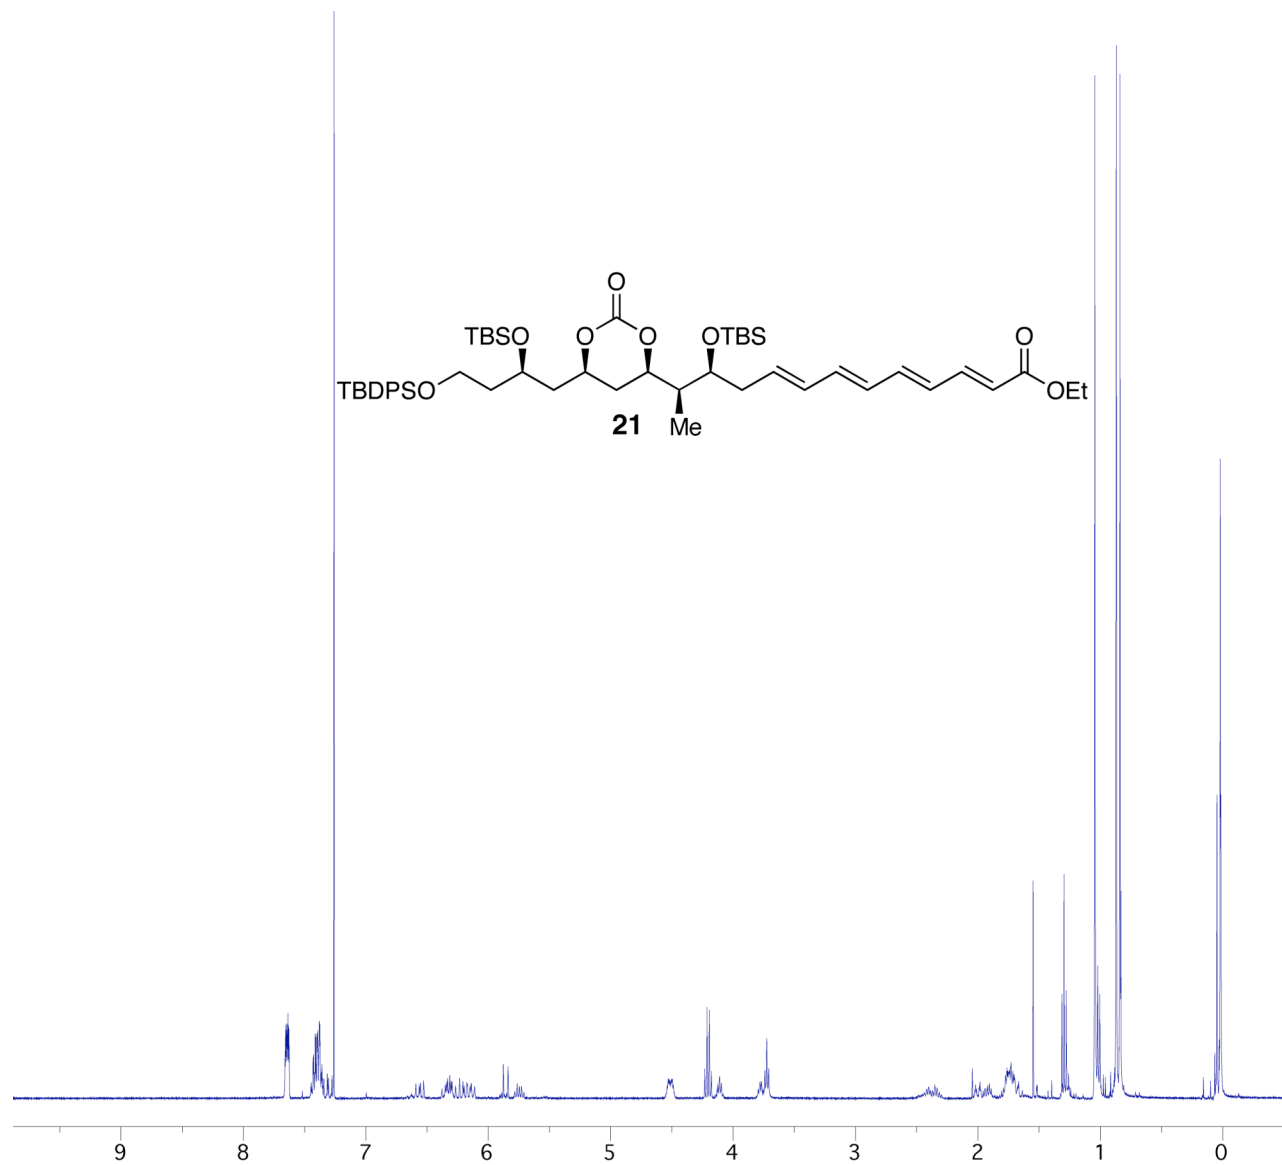

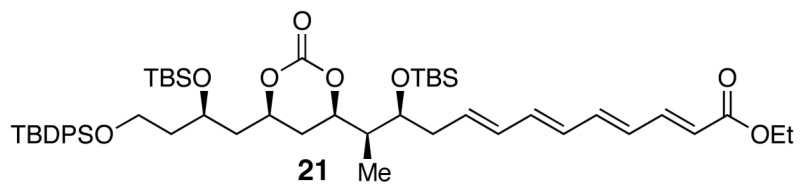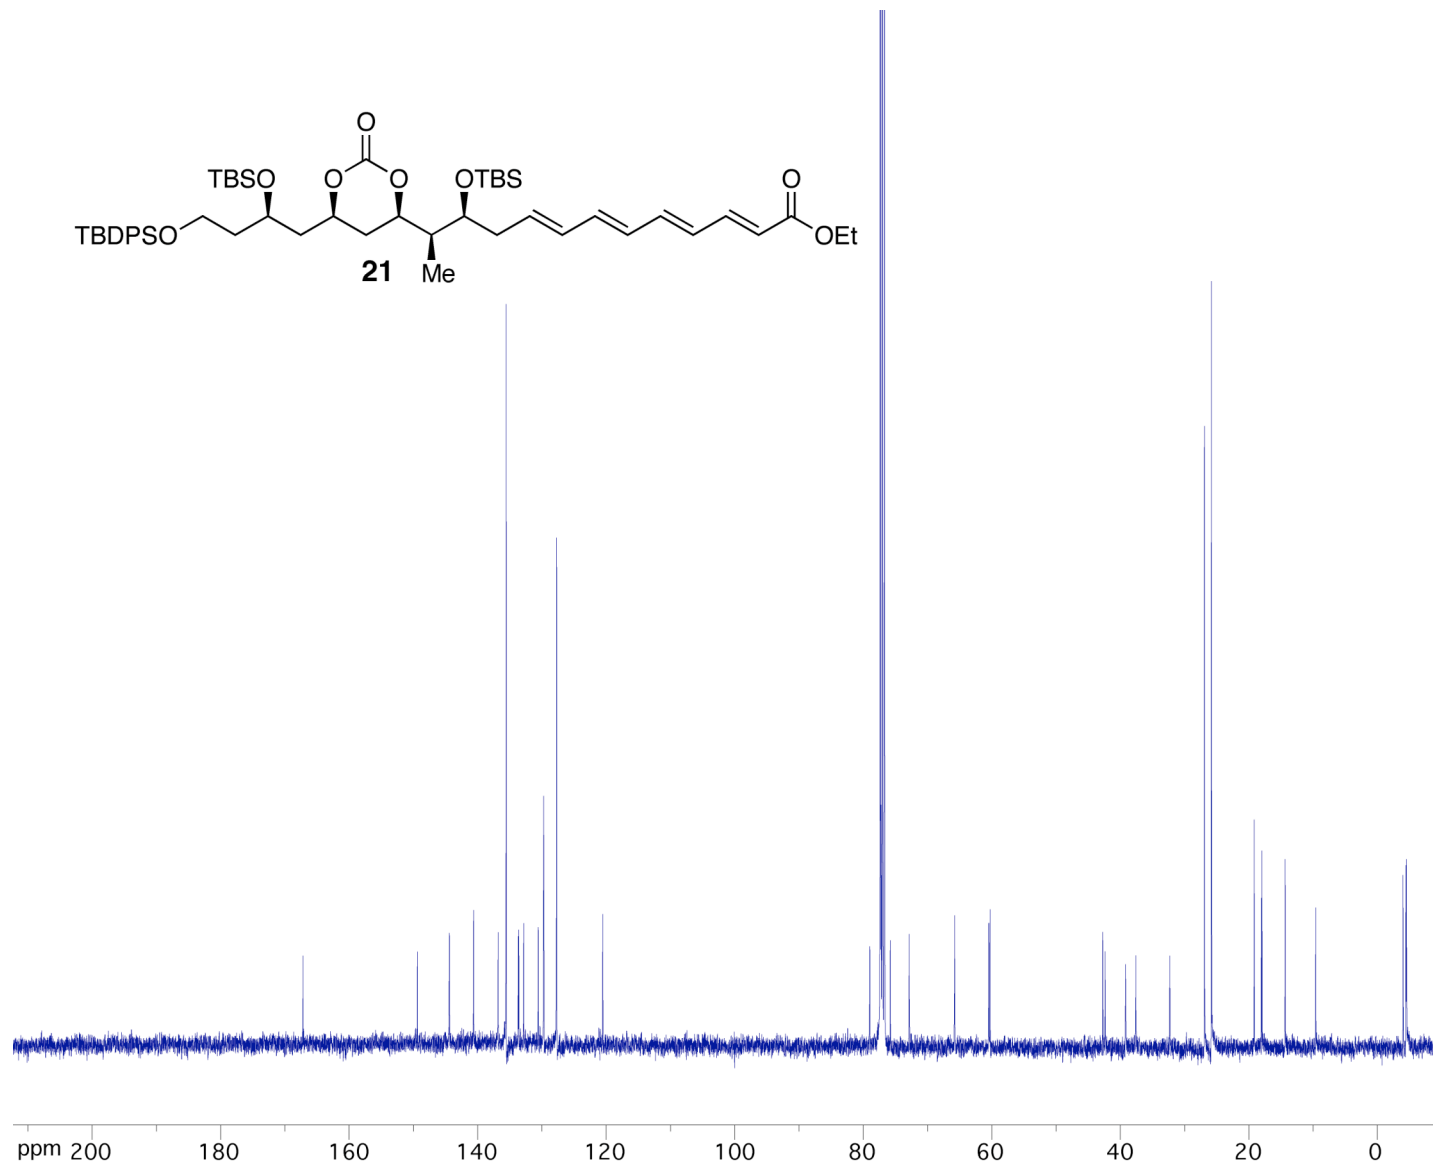



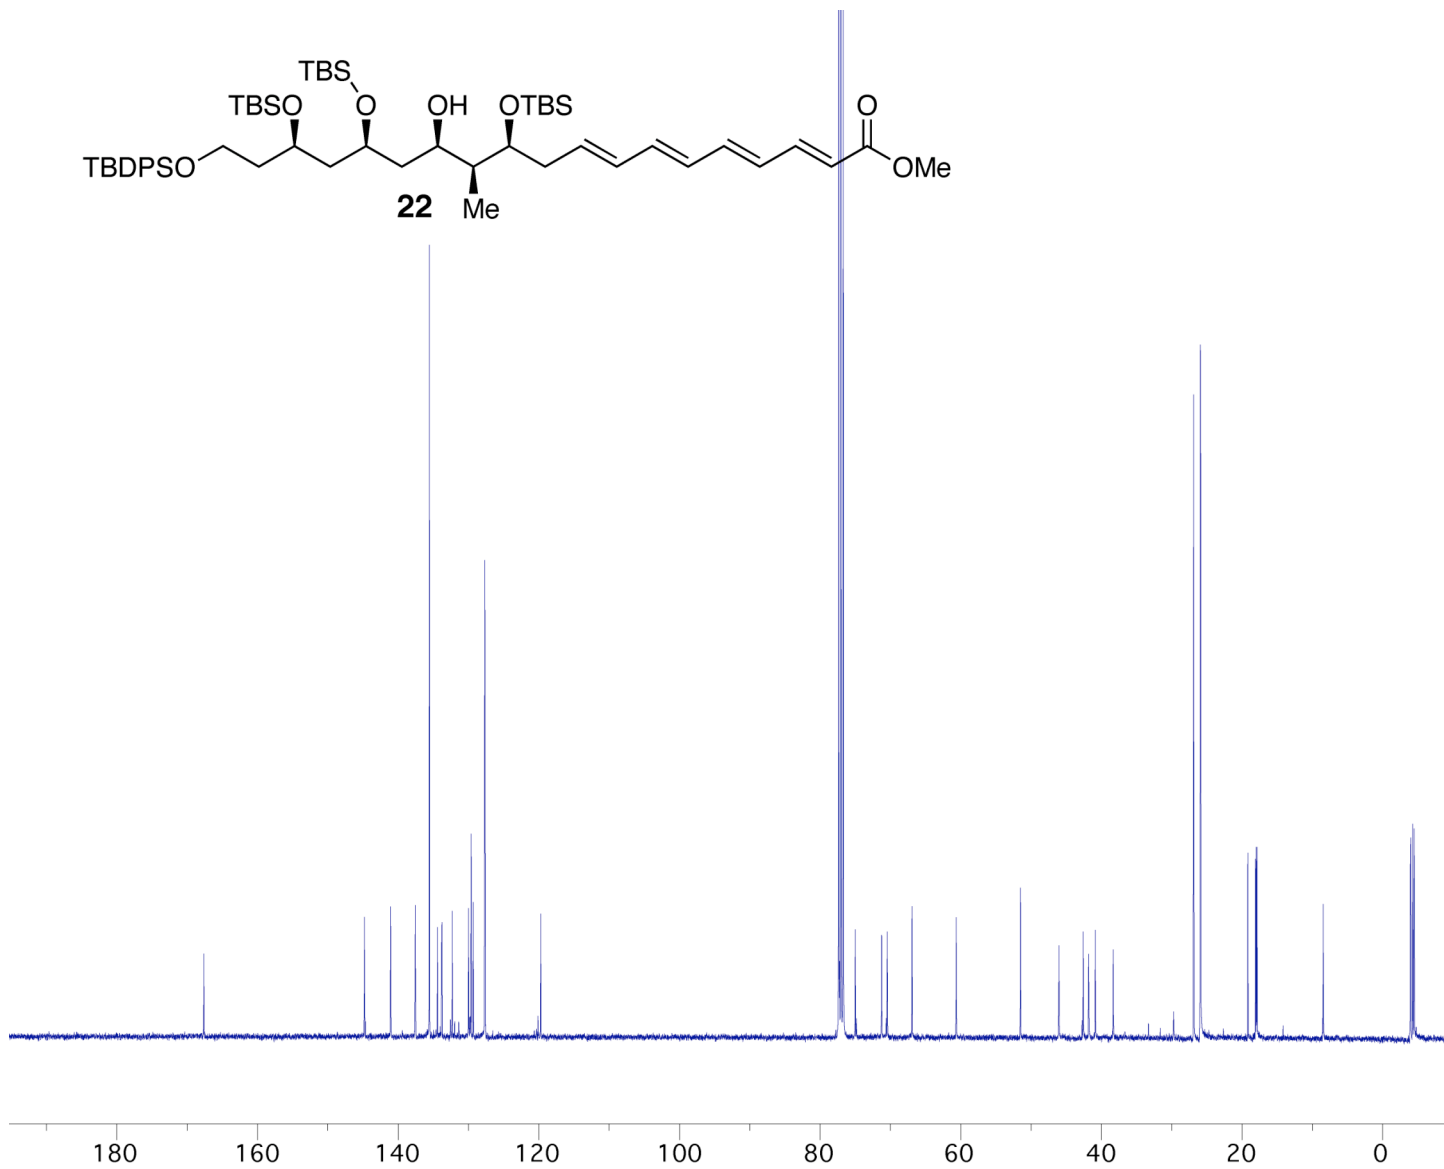

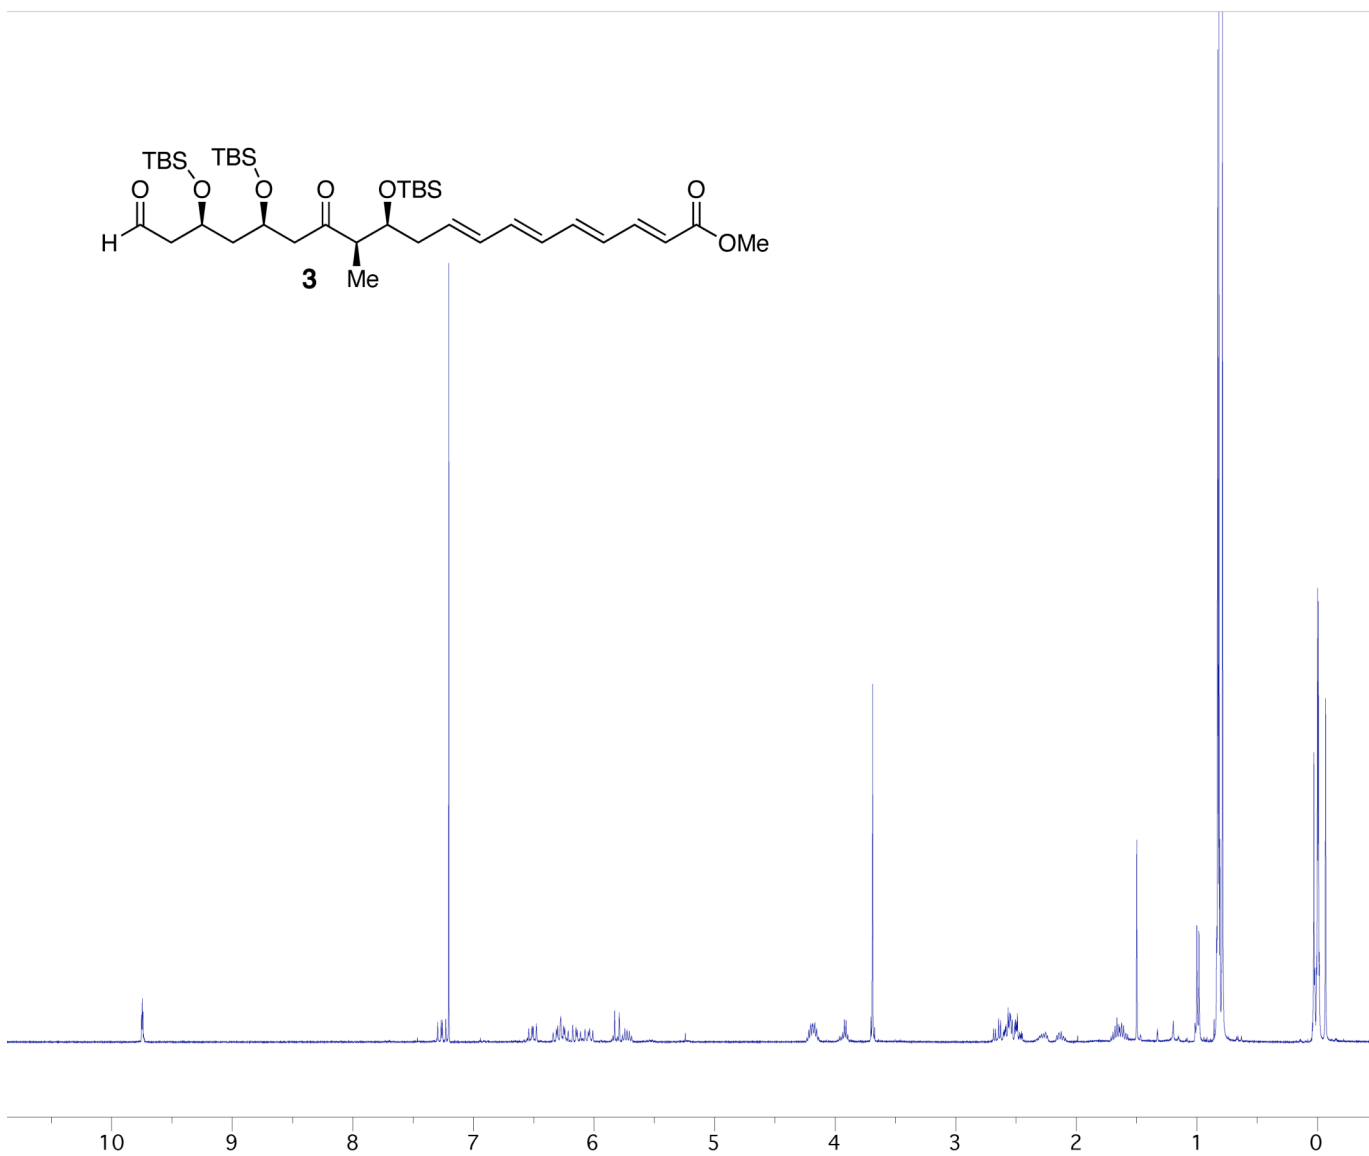

Supplement: NIHMS60243-supplement-SI2.pdf [file NIHMS60243-supplement-SI2.pdf]
